# Supplementary material for: Structural insights into the function of ZRANB3 in replication stress response
Source: PubMed Central journal article supplement (PMC5481773; doi:10.1038/ncomms15847), 2017-06-16
Supplement: ncomms15847-s1.pdf [file ncomms15847-s1.pdf]

Type of file: PDF

Size of file: 0 KB

Title of file for HTML: Supplementary Information

Description: Supplementary figures, supplementary tables and supplementary methods.

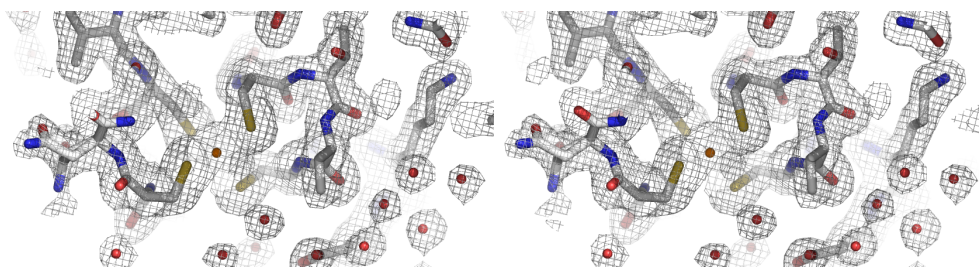

Supplementary Figure 1. The HNH domain electron density map

Stereo view of the HNH domain electron density map. Shown is a non-catalytic zinc-finger coordinated with four cysteine residues. 2Fo-Fc density map is contoured at 1.0  $\sigma$  and colored grey.

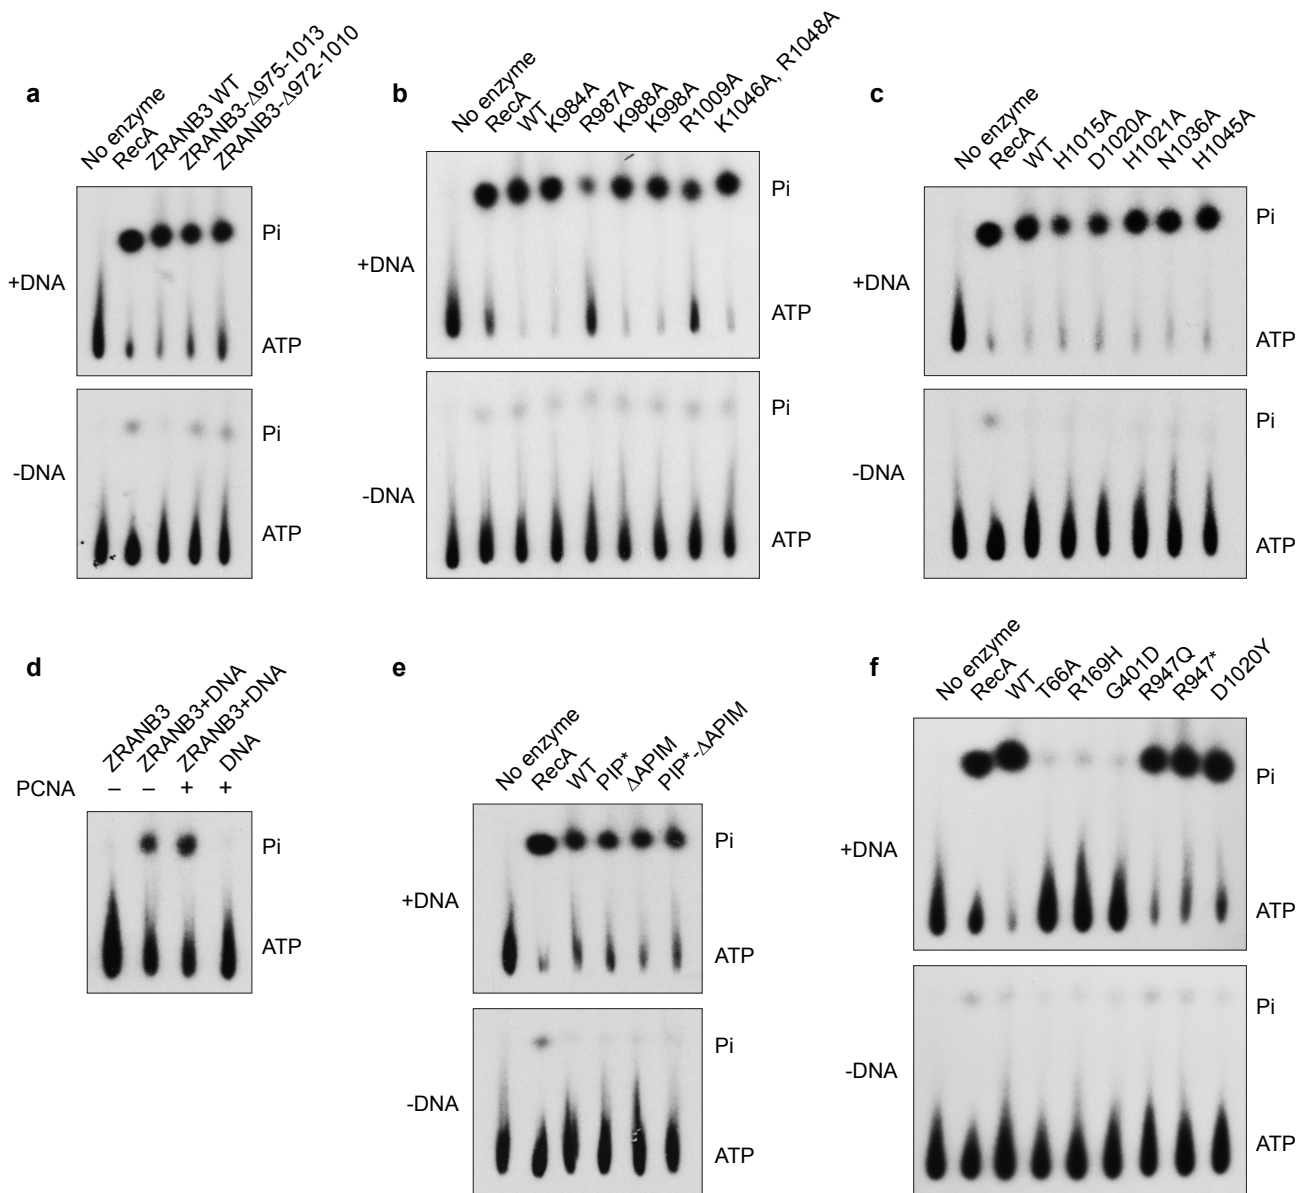

Supplementary Figure 2. ATPase activities of ZRANB3 proteins

**a.- f.** ATPase assay with the wild-type and mutant ZRANB3 proteins. RecA was used as a control. Recombinant proteins were incubated with  $^{32}$ P-labeled ATP in the absence or presence of DNA (splayed DNA duplex). Reaction products were resolved by thin-layer chromatography. Chromatographic mobilities of the ATP substrate and Pi product are indicated. **a.** ATPase assay with the two mutants containing deletions of the ZRANB3-specific helical domain (ZRANB3- $\Delta$ 975-1013 and ZRANB3- $\Delta$ 972-1010). **b.** ATPase assay with the basic residues HNH mutants. **c.** ATPase assay with the HNH active site mutants. **d.** PCNA does not stimulate ATPase activity of ZRANB3. **e.** ATPase assay with the PCNA binding mutants. **f.** ATPase assay with the cancer associated ZRANB3 mutants.

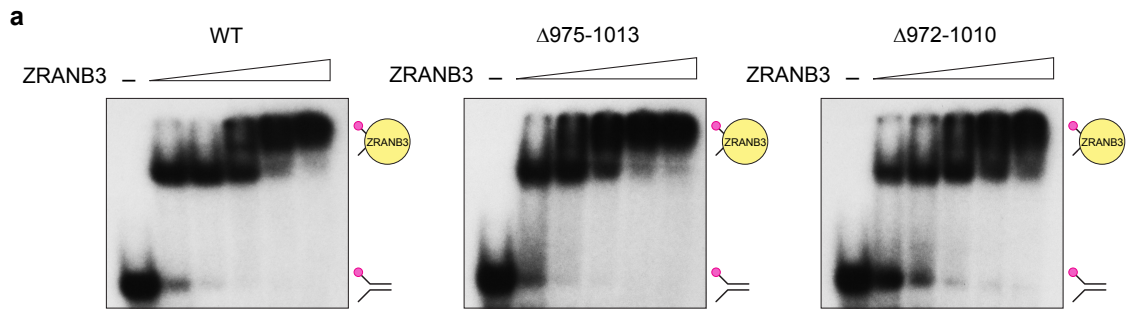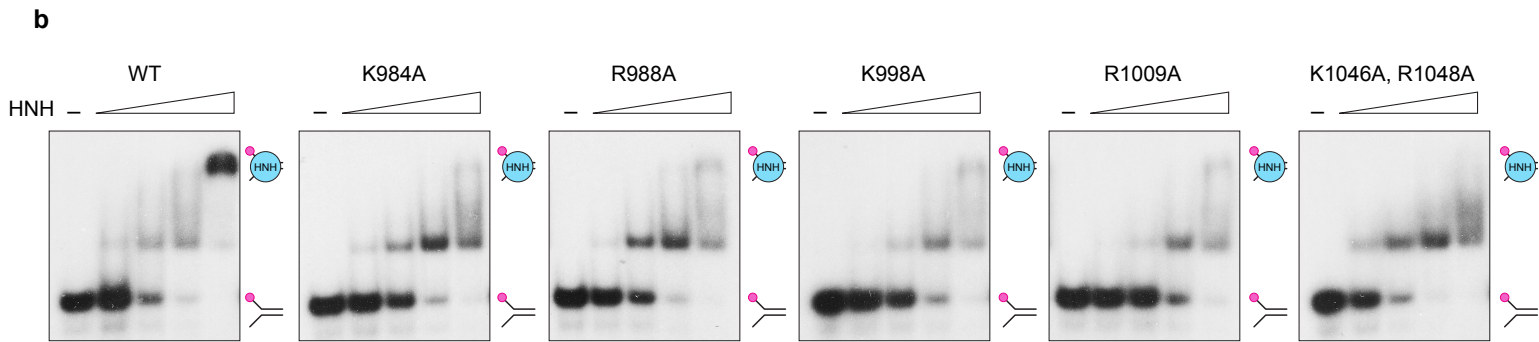

Supplementary Figure 3. Electrophoretic mobility-shift assays

**a.** Electrophoretic mobility-shift assay with wild type and mutant ZRANB3 proteins. Increasing concentrations (11, 22, 44, 88, 176 nM) of purified wild type and mutant ZRANB3 proteins were incubated with radioactively labelled substrate DNA and resolved by polyacrylamide gel electrophoresis.

**b.** Electrophoretic mobility-shift assay with the HNH domain wild type and mutant proteins. Increasing concentrations (4, 8, 16, 32  $\mu$ M) of purified Trx-tagged wild type and mutant HNH domains (amino acids 871-1079) were incubated with radioactively labelled substrate DNA and resolved by polyacrylamide gel electrophoresis.

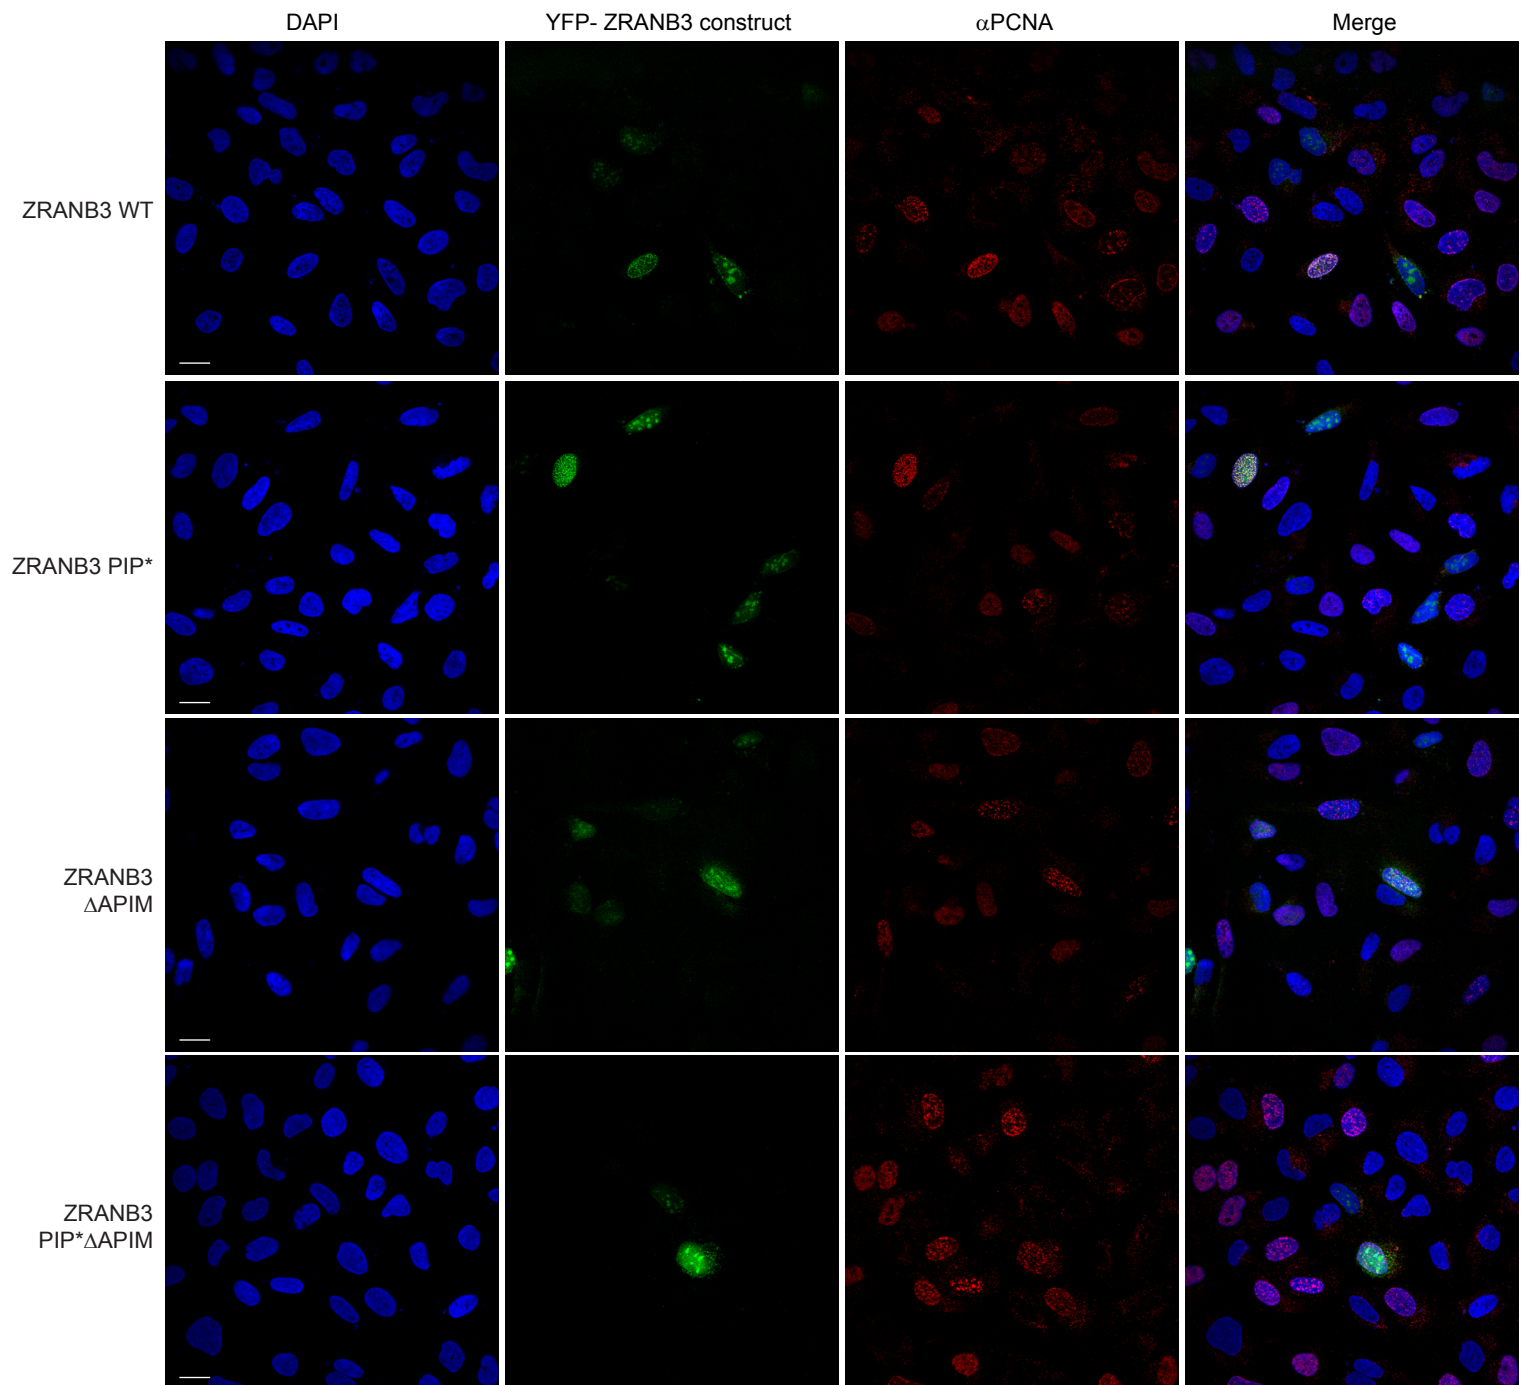

Supplementary Figure 4. Colocalization of ZRANB3 with PCNA

Accumulation of ZRANB3 at sites of ongoing DNA replication in the absence of exogenous DNA damage. U2OS cells were transfected with YFP-ZRANB3 constructs, treated with a pre-extraction buffer (see Materials and methods), fixed and stained with PCNA antibody. The percentage of cells containing ZRANB3 foci that colocalize with PCNA was determined and shown in Fig. 5e. Scale bar: 20  $\mu$ m.

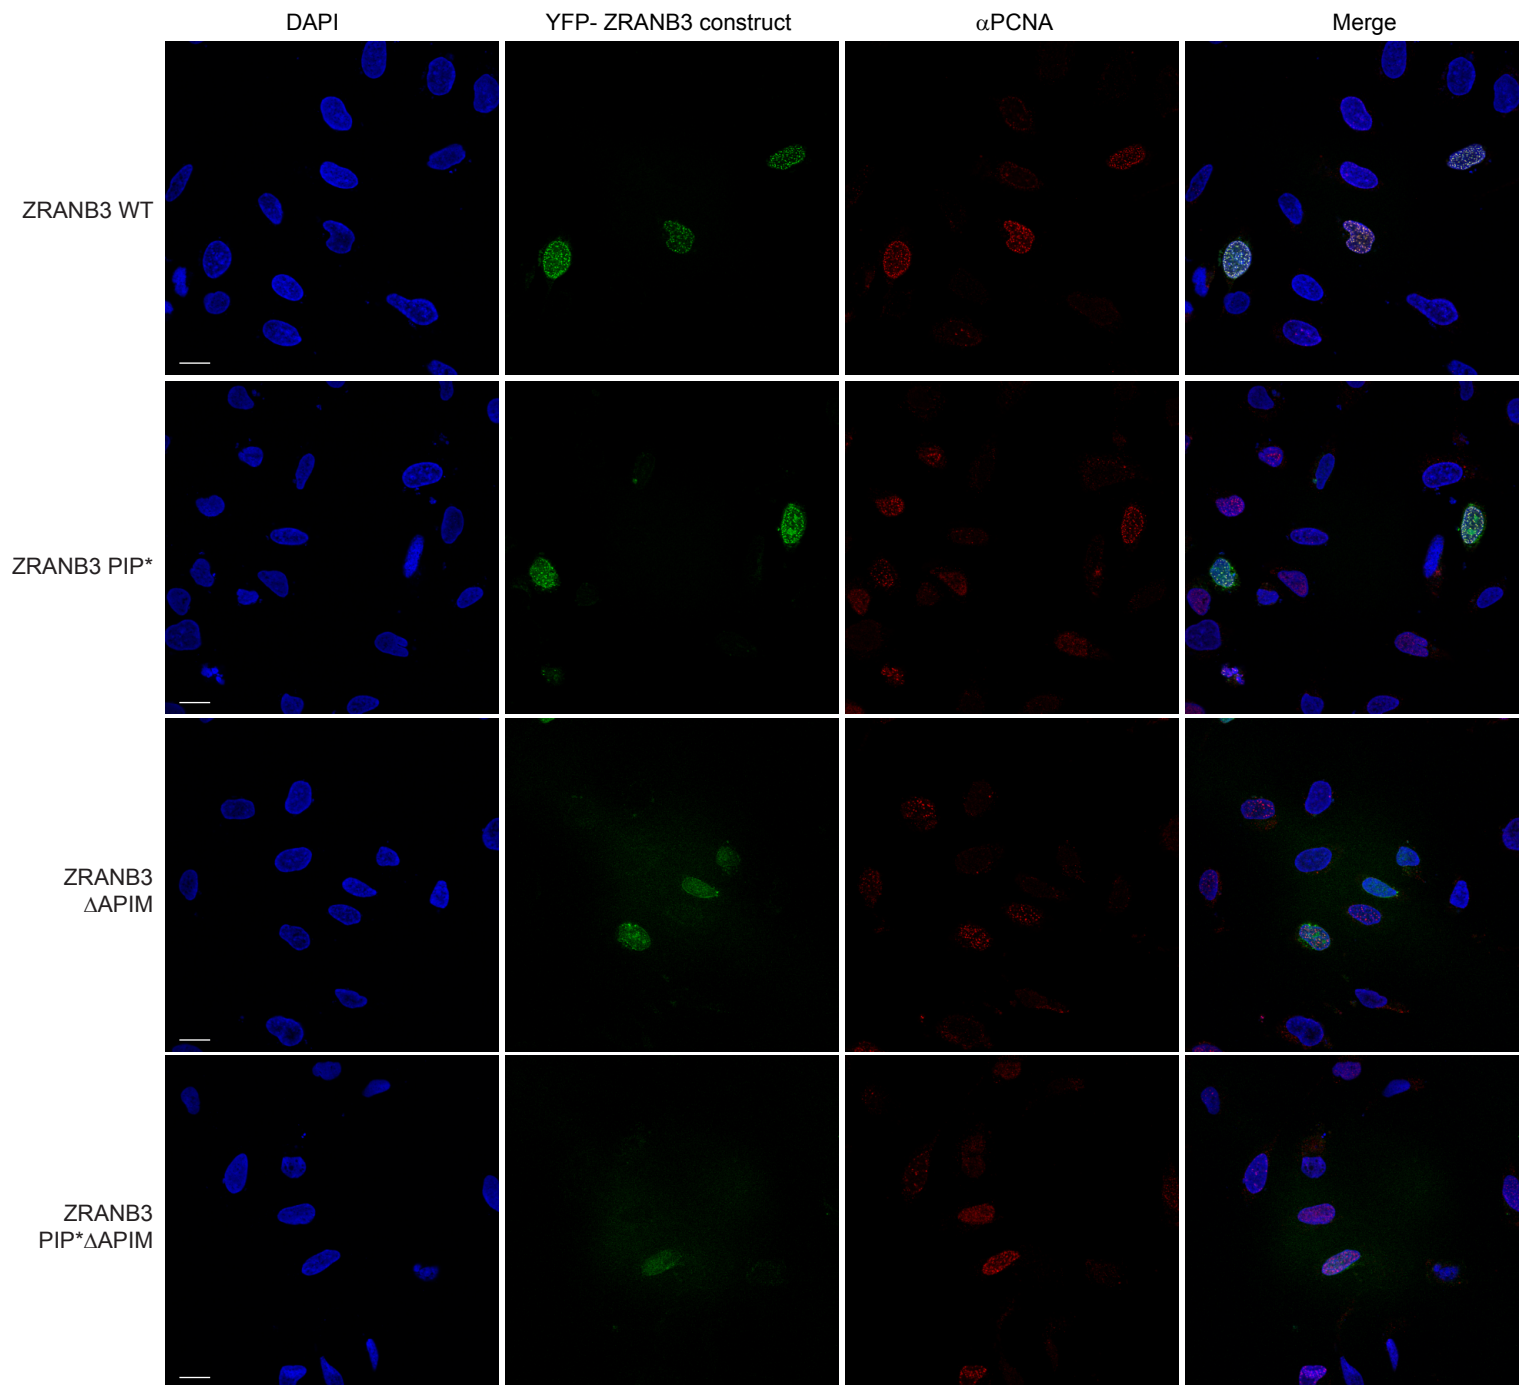

Supplementary Figure 5. Colocalization of ZRANB3 with PCNA after UV damage

Accumulation of ZRANB3 at sites of stalled DNA replication following DNA damage. U2OS cells were transfected with YFP-ZRANB3 and exposed to UV irradiation. After 6 h, cells were treated with a pre-extraction buffer (see Materials and methods), fixed and stained with PCNA antibody. The percentage of cells containing ZRANB3 foci that colocalize with PCNA was determined and shown in Fig. 5e. Scale bar: 20  $\mu$ m.

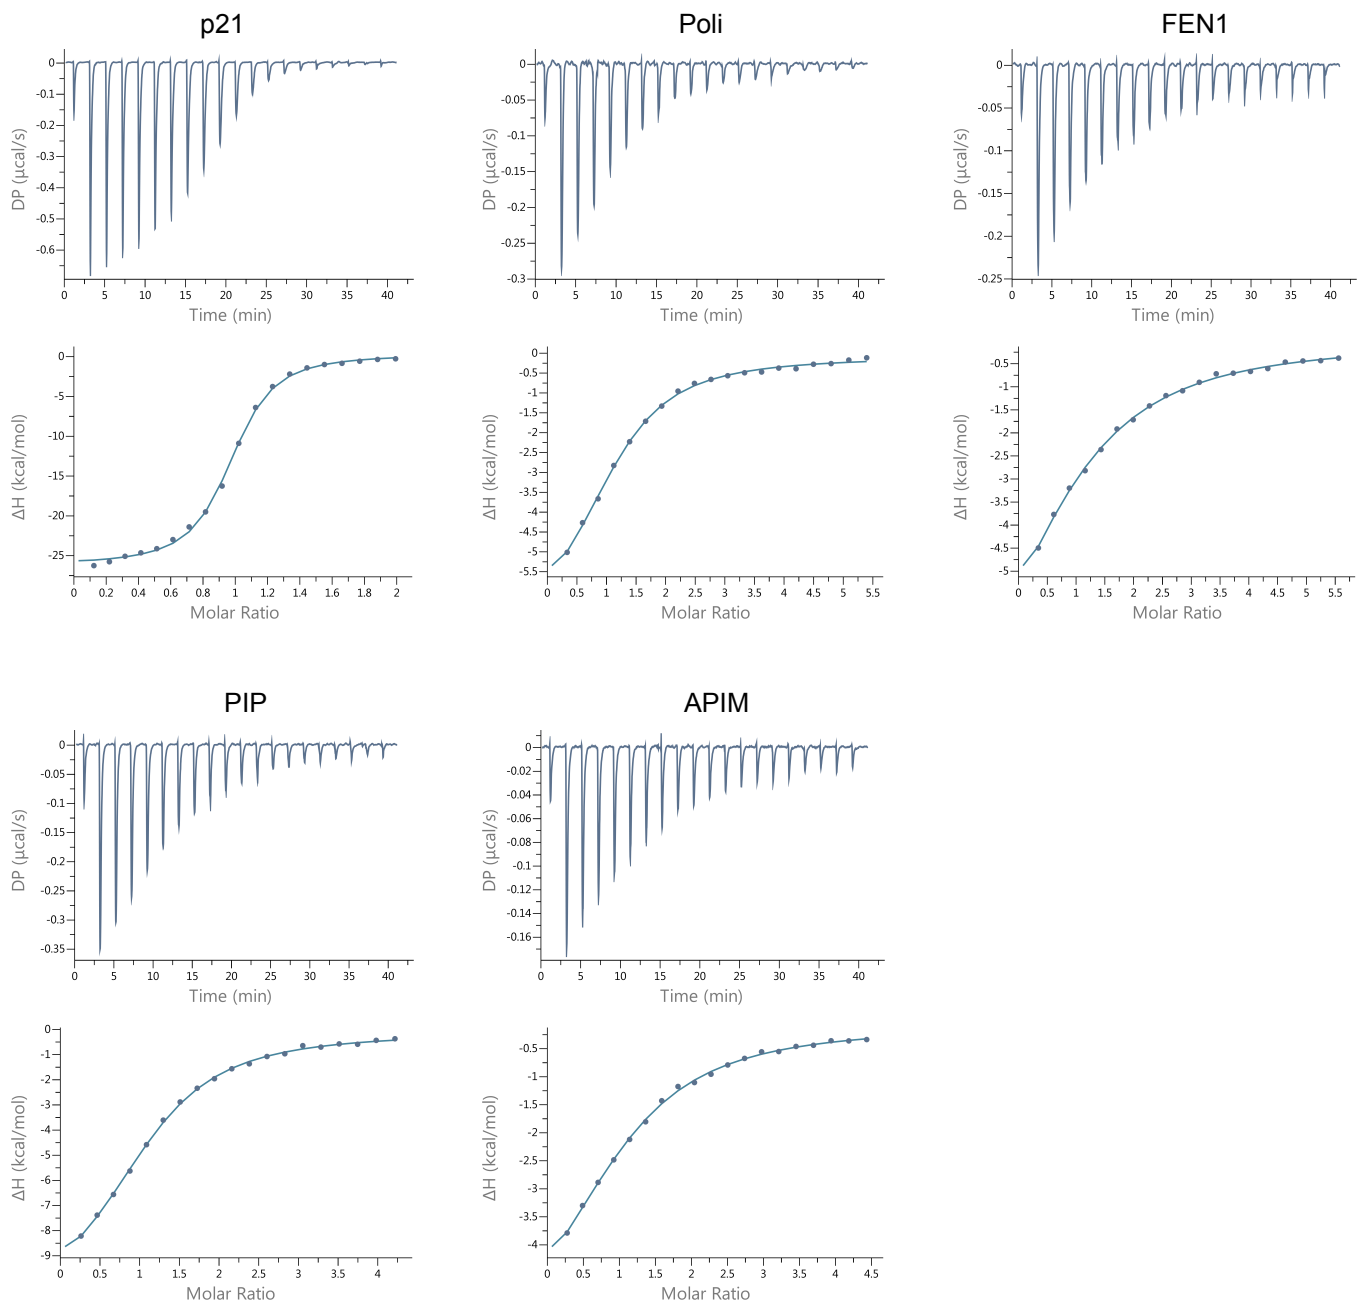

**Supplementary Figure 6. Isothermal titration calorimetry measurements**  
 Isothermal titration calorimetry measurements of PCNA with the indicated peptides. Shown are thermograms and the binding isotherms from the integrated thermogram fits, with the one-site model (as analysed by MicroCal PEAQ-ITC Analysis Software).

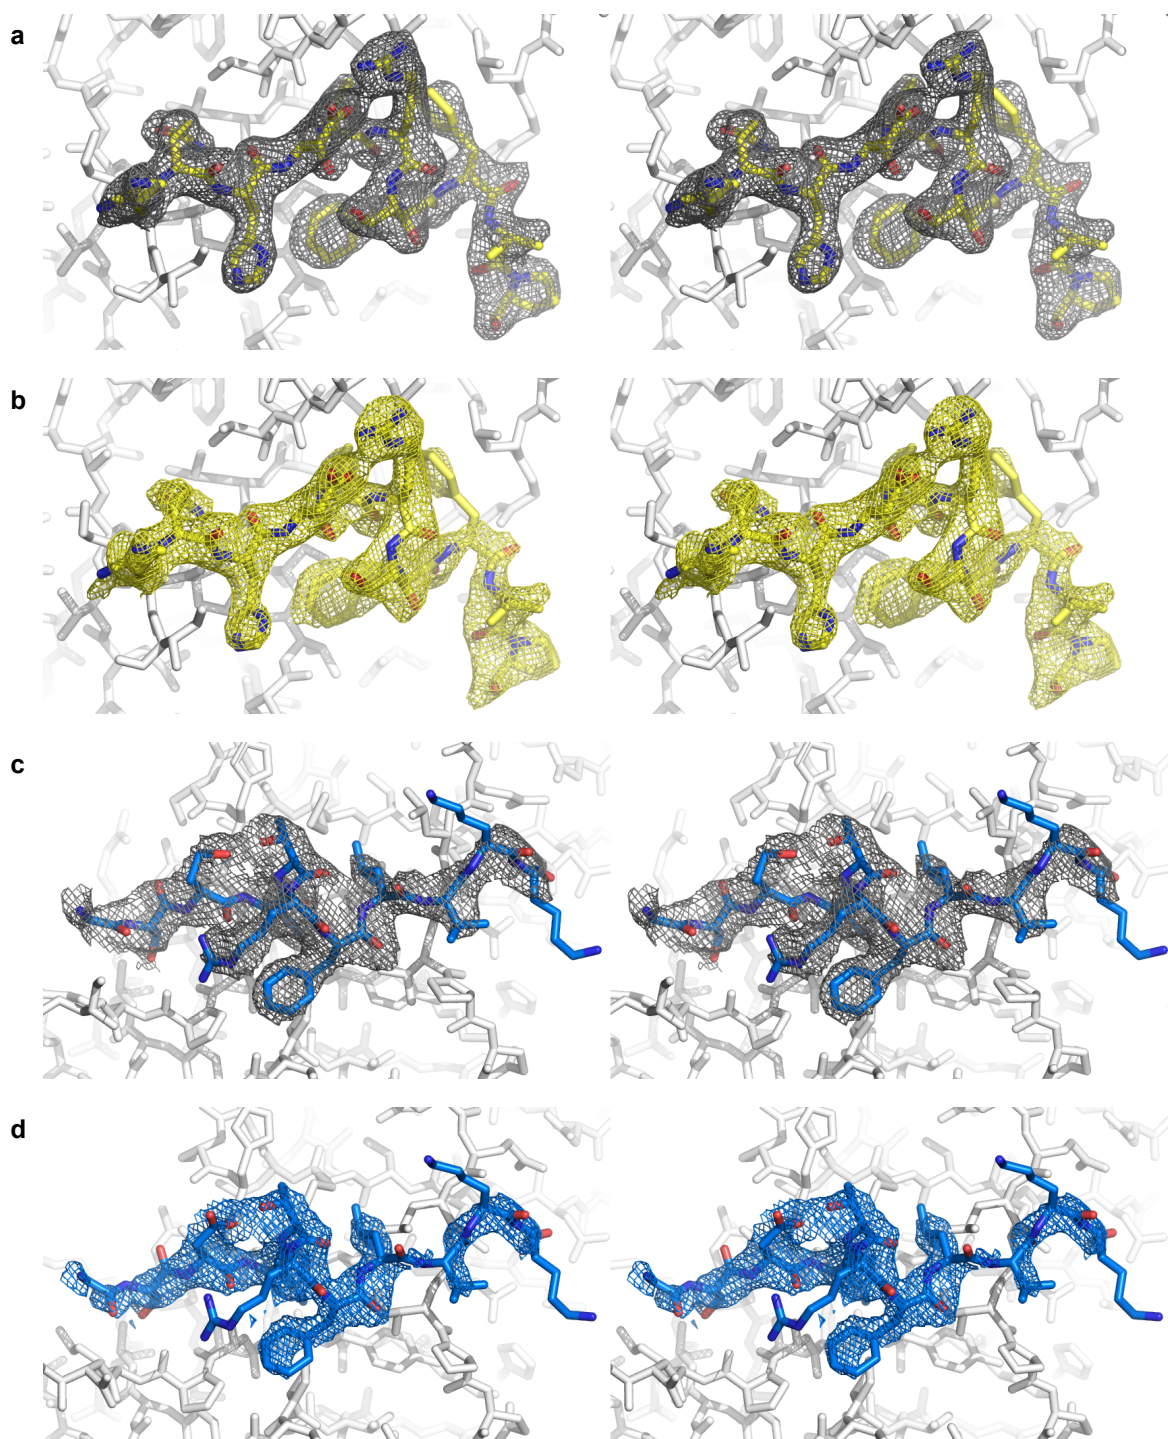

Supplementary Figure 7. Electron density maps of PIP box and APIM motif peptides

**a.** Stereo view of the PIP box peptide electron density map (grey). 2Fo–Fc density map is contoured at 1.0  $\sigma$  and colored grey. PIP box peptide is shown as yellow and PCNA as white sticks. **b.** Unbiased electron density map for the PIP peptide (yellow), calculated after molecular replacement using a trimeric PCNA structure (PDB code 1VYM) as a search model and 50 cycles of initial refinement with jelly-body refinement in REFMAC5. PIP box peptide is shown as yellow and PCNA as white sticks. **c.** Stereo view of the APIM motif peptide electron density map (grey). 2Fo–Fc density map is contoured at 1.0  $\sigma$  and colored grey. APIM motif peptide is shown as blue and PCNA as white sticks. **d.** Unbiased electron density map for the APIM peptide (blue), calculated after molecular replacement using a trimeric PCNA structure (PDB code 1VYM) as a search model and 50 cycles of initial refinement with jelly-body refinement in REFMAC5. APIM motif peptide is shown as yellow and PCNA as white sticks.



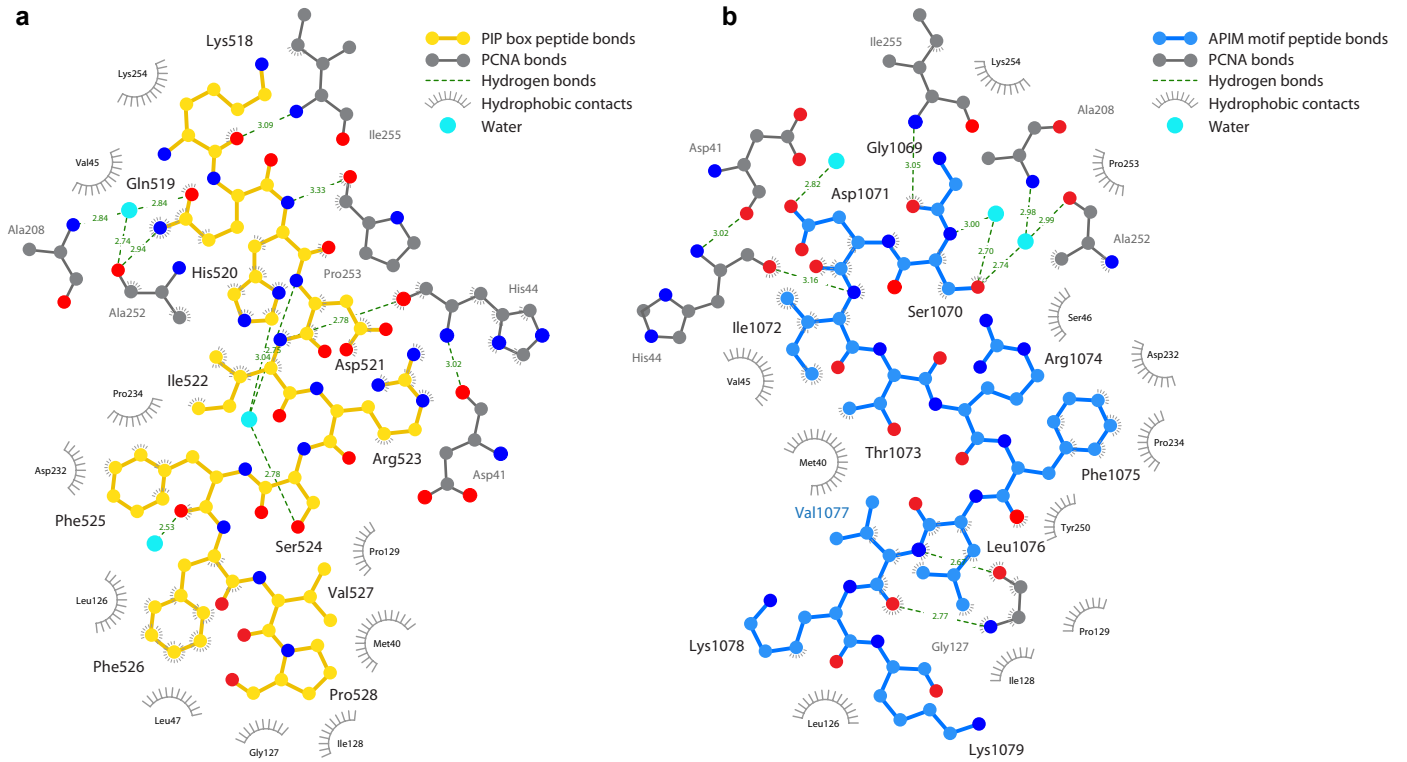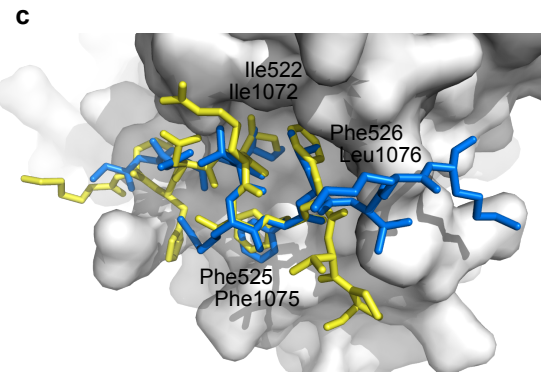

Supplementary Figure 8. Interactions of ZRANB3 PCNA binding peptides with PCNA  
**a.** Schematic diagram of PCNA-PIP box peptide interactions generated by LIGPLOT.  
**b.** Schematic diagram of PCNA-APIM motif peptide interactions generated by LIGPLOT.  
**c.** Superimposition of the PIP box (yellow sticks, residues 518-528) and APIM motif (blue sticks, residues 1069-1079) peptides bound to PCNA (grey surface.)

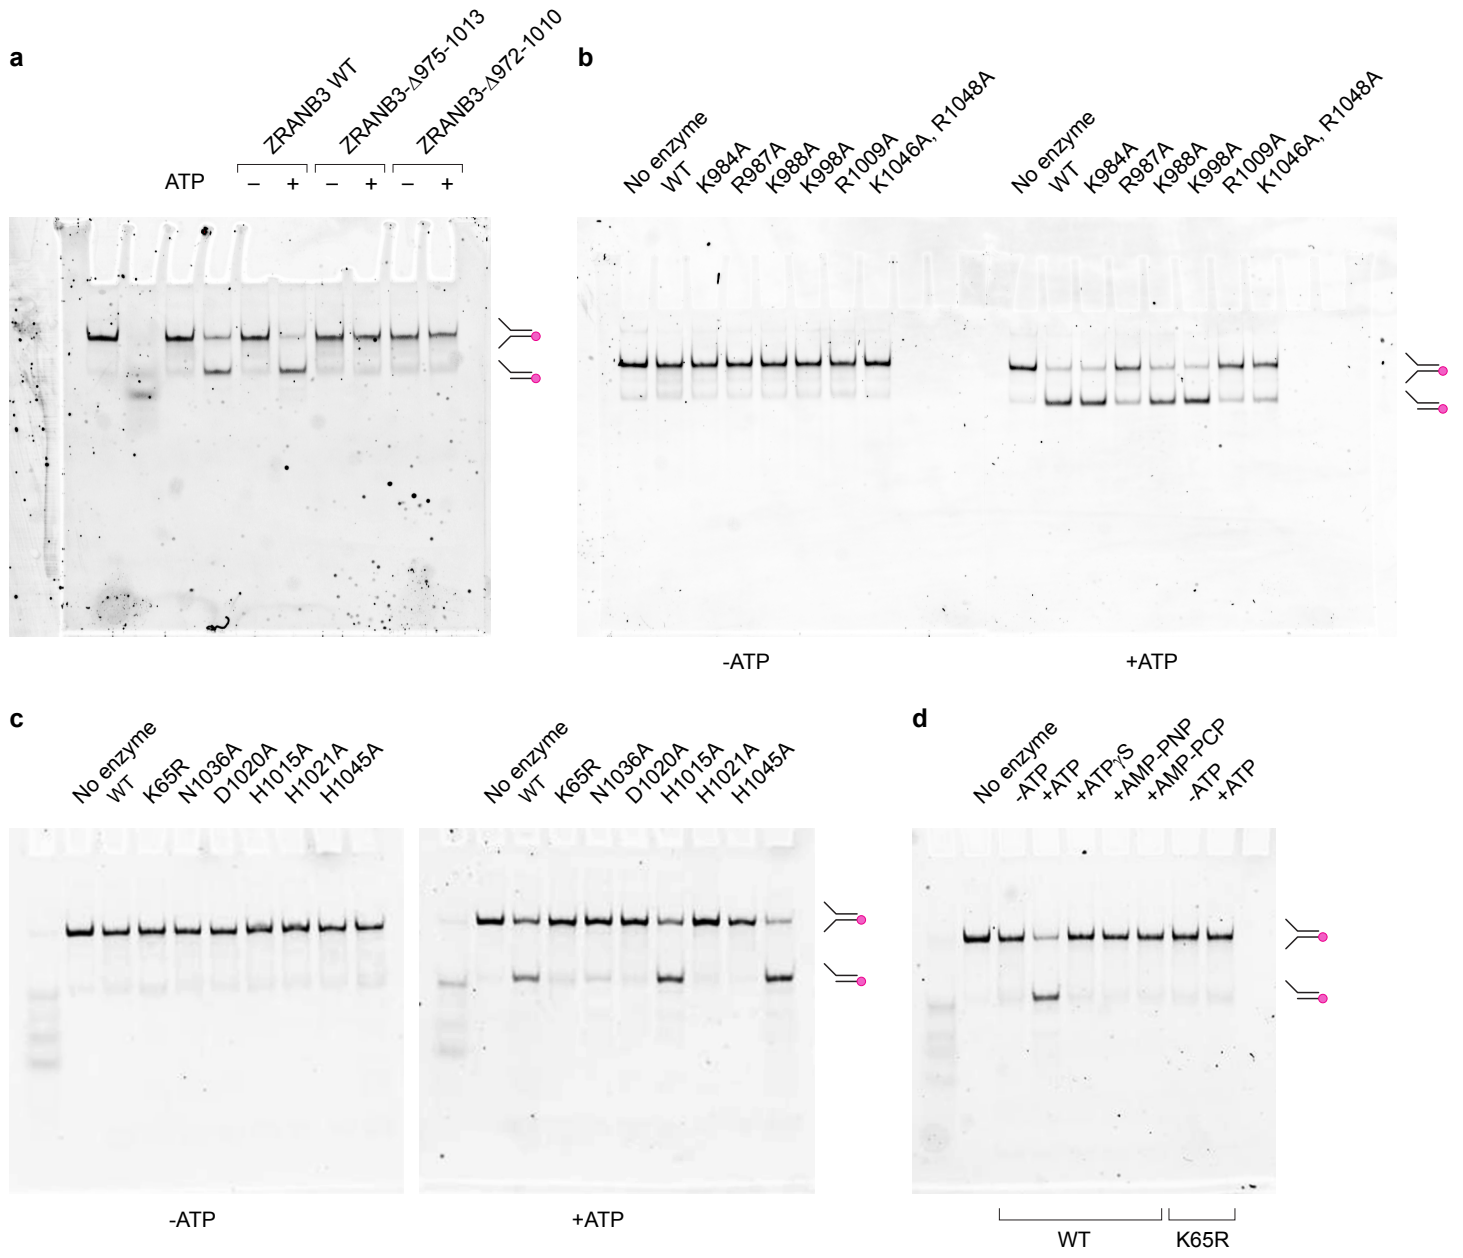

Supplementary Figure 9. Uncropped scans of gels shown in Figs. 1-3.

**a.** Uncropped scan of Fig. 1e. **b.** Uncropped scan of Fig. 2d. **c.** Uncropped scan of Fig. 3c. **d.** Uncropped scan of Fig. 3d.



**a**

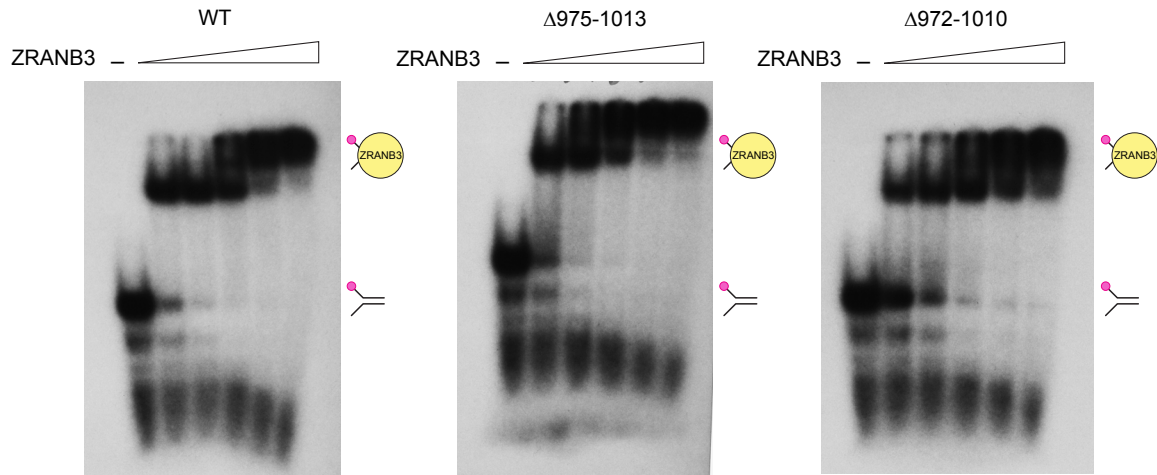

**b**

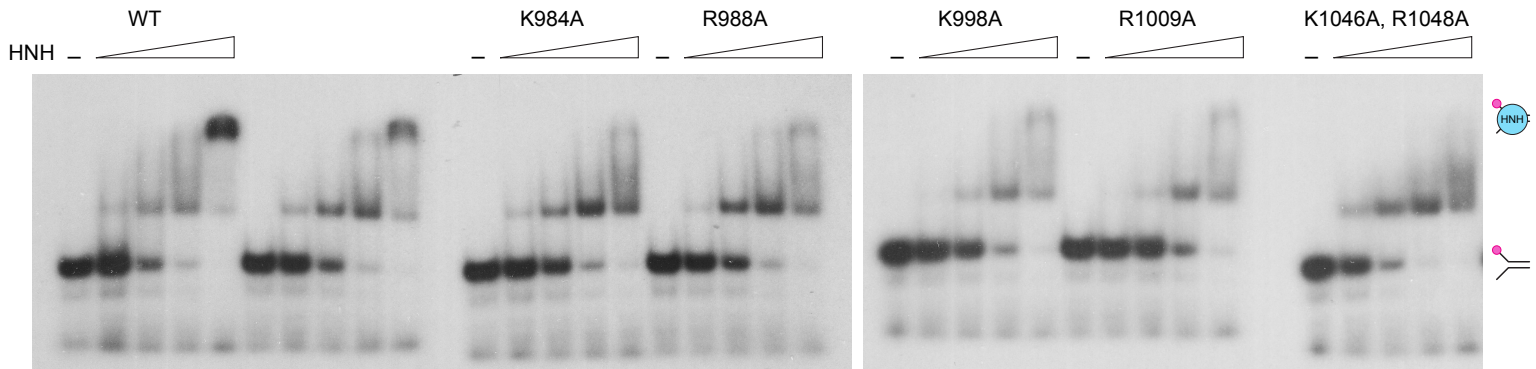

Supplementary Figure 11. Uncropped scans of gels shown in Supplementary Fig. 3.

**a.** Uncropped scan of Supplementary Fig. 3a. **b.** Uncropped scan of Supplementary Fig. 3b.

Supplementary Table 1. Isothermal titration calorimetry measurements of PCNA with the indicated peptides.

| Peptide     | N (stoichiometry) | K <sub>D</sub> (μM) | ΔG (kcal mol <sup>-1</sup> ) | ΔH (kcal mol <sup>-1</sup> ) | -TΔS (kcal mol <sup>-1</sup> ) |
|-------------|-------------------|---------------------|------------------------------|------------------------------|--------------------------------|
| p21         | 0.944 ± 0.006     | 0.275 ± 0.0248      | -89.5                        | -26.4 ± 0.343                | 17.5                           |
| Poli        | 1.08 ± 0,027      | 5.45 ± 0.571        | -7.18                        | -7.11 ± 0.338                | -0.062                         |
| FEN1        | 1.02 ± 0.095      | 17.3 ± 2.93         | -6.5                         | -10.5 ± 1.68                 | -39.9                          |
| ZRANB3 PIP  | 1.08 ± 0.016      | 4.8 ± 0.352         | -7.26                        | -11.1 ± 0.325                | 3.88                           |
| ZRANB3 APIM | 1.04 ± 0.036      | 9.24 ± 1.14         | -6.87                        | -6.34 ± 0.475                | -0.532                         |

Peptide sequences: p21 <sup>135</sup>DSQGRKRRQTSMTDFYHSKRRL<sup>157</sup>, Poli <sup>438</sup>LKALNTAKKGLIDYYLMPSLST<sup>459</sup>, FEN1 <sup>329</sup>SKSRQGSTQGRLLDFFKVTGSL<sup>350</sup>, ZRANB3 (PIP) <sup>511</sup>FTHFEKEKQHIRSFFVPQPK<sup>532</sup>, ZRANB3 (APIM) <sup>1058</sup>QVRRQSLASKHGSDITRFLVKK<sup>1079</sup>.

Supplementary Table 2. Bioinformatic analysis of *ZRANB3* variants by pathogenicity prediction programmes.

| Algorithm     | PolyPhen-2 |                   | SIFT  |            | Mutation Assessor |        | Mutation Taster |                 |
|---------------|------------|-------------------|-------|------------|-------------------|--------|-----------------|-----------------|
|               | Score      | Prediction        | Score | Prediction | FI Score          | Impact | Score           | Prediction      |
| <b>T66A</b>   | 1.000      | Probably damaging | 0     | Damaging   | 4.54              | High   | 58              | Disease causing |
| <b>R169H</b>  | 1.000      | Probably damaging | 0     | Damaging   | 3.47              | Medium | 29              | Disease causing |
| <b>R313C</b>  | 0.124      | Benign            | 0     | Damaging   | 2.565             | Medium | 180             | Disease causing |
| <b>K340T</b>  | 1.000      | Probably damaging | 0     | Damaging   | 4.29              | High   | 78              | Disease causing |
| <b>G401D</b>  | 1.000      | Probably damaging | 0.01  | Damaging   | 4.49              | High   | 94              | Disease causing |
| <b>F414C</b>  | 1.000      | Probably damaging | 0     | Damaging   | 3.185             | Medium | 205             | Disease causing |
| <b>K706T</b>  | 0.002      | Benign            | 0.1   | Tolerated  | 1.095             | Low    | 78              | Polymorphism    |
| <b>R947Q</b>  | 1.000      | Probably damaging | 0.01  | Damaging   | 2.48              | Medium | 43              | Disease causing |
| <b>S997P</b>  | 0.987      | Probably damaging | 0     | Damaging   | 2.7               | Medium | 74              | Polymorphism    |
| <b>D1020Y</b> | 1.000      | Probably damaging | 0     | Damaging   | 4.425             | High   | 160             | Disease causing |

The PolyPhen-2 score ranges from 0.0 (tolerated) to 1.0 (deleterious). The software uses structural and comparative evolutionary considerations to predict the possible impact of amino acid substitutions <sup>61</sup>.

SIFT score ranges from 0 to 1. The amino acid substitution is predicted damaging if the score is ≤ 0.05, and tolerated if the score is > 0.05. SIFT prediction is based on the degree of conservation of amino acid residues in sequence alignments derived from closely related sequences, collected through PSI-BLAST <sup>62</sup>.

The functional impact (FI) score in mutation assessor is derived from multiple sequence alignments of sequence homologs. Larger scores indicate more likely functional impact of a mutation <sup>63</sup>.

The Mutation Taster score is taken from the Grantham Matrix for amino acid substitutions and reflects the physicochemical difference between the original and the mutated amino acid. It ranges from 0.0 to 215. The software uses the frequency of the respective amino acid exchange in known disease causing mutations and polymorphisms for the classification. It predicts an alteration as one of four possible types: disease causing - i.e. probably deleterious; disease causing automatic - i.e. known to be deleterious; polymorphism - i.e. probably harmless; and polymorphism automatic - i.e. known to be harmless <sup>64</sup>.

Supplementary Table 3. Selection of *ZRANB3* mutations associated with endometrial carcinomas.

| <b>Mutation</b> | <b>Location</b>               | <b>Conservation</b> | <b>Impact</b>                                    |
|-----------------|-------------------------------|---------------------|--------------------------------------------------|
| T66A            | Helicase core, Walker A motif | Yes                 | ATPase and endonuclease deficient <i>ZRANB3</i>  |
| E97*            | Helicase core                 | No                  | Functional null                                  |
| K340T           | Helicase core                 | Yes                 | Unknown                                          |
| G401D           | Helicase core                 | Yes                 | Unknown                                          |
| F414C           | Helicase core                 | Yes                 | Unknown                                          |
| R947*           |                               | No                  | Truncated <i>ZRANB3</i> , endonuclease deficient |
| D1020Y          | HNH domain, active site       | Yes                 | Endonuclease deficient                           |
| C1041Hfs*13     | HNH domain, zinc-finger       | Yes                 | Truncated <i>ZRANB3</i> , endonuclease deficient |

C1041Hfs\*13 denotes a frameshift mutation which changes Cys1041 to His, and introduces a stop codon at position 1053.

## Supplementary Methods

Oligonucleotides used in this study:

### ZRANB3 HNH domain into pNH-TrxT

TACTTCCAATCCATGTCTAATAACAGTTACCTG and GCTAAGCTCGAGTCACTTTGATGCTAGAGATTGTC

### ZRANB3 into pFASTBac-His6-TEV

TACTTCCAATCCATGCCTAGGGTTCATAACATAA and TATCCACCTTTACTGTCACTTCTTTACCAAAAATCG

### Introducing deletions into the HNH domain

ZRANB3- $\Delta$ 975-1013

GTAATGTGAACGCACAAGAAGGACATTTCTGGCAGGTG and CACCTGCCAGAAATGCCTTCTTGTGCGTTCACATTAC

ZRANB3- $\Delta$ 972-1010

CAGCTCTGTAATGTGAACCCAGGGGAAGGACATTTC and GAAATGCCTTCCCCTGGGTTACATTACAGAGCTG

### Mutation of the HNH domain

K984A

ACGTCTGAGAGATGCCCTGCAAGTCAGAGGAAGAATCTT and AAGATTCTTCTCTGACTTGCAGGGGCATCTCTCAGACGT

R987A

GAGATGCCCCTAAAAGTCAGGGCAAGAATCTTCTGTATGCTA and TAGCATAACAGAAGATTCTTCGCCTGACTTTTAGGGGCATCTC

K988A

TGCCCTAAAAGTCAGAGGGCAATCTTCTGTATGCTACC and GGTAGCATAACAGAAGATTTCGCCTCTGACTTTTAGGGGCA

K998A

GTATGCTACCTGGACTTCAGCGCTCCATTAGAACAGCTAA and TTAGCTGTTCTAATGGGAGCGCTGAAGTCCAGGTAGCATA

R1009A

CCCATTAGAACAGCTAAATGAAATGATAGCAAACCCAGGGGAAGGA and TCCTTCCCCTGGGTTTGTATCATTTTATTAGCTGTTCTAATGGG

K1046A, R1048A

CTCTCTGCACAGTCTGTACGCAGAGGCAACTGCCAGACAAGCTAAGG and

CCTTAGCTTGTCTGGCAGTTGCCTCTGCGTGACAGACTGTGCAGAGAG

H1015A

GAAACCCAGGGGAAGGAGCTTTCTGGCAGGTGGATC and GATCCACCTGCCAGAAAGCTCCTTCCCCTGGGTTTC

D1020A

CATTTCTGGCAGGTGGCTCACATCAAGCCAGTG and CACTGGCTTGATGTGAGCCACCTGCCAGAAATG

H1021A

CATTTCTGGCAGGTGGATGCCATCAAGCCAGTGTATGG and CCATACACTGGCTTGATGGCATCCACCTGCCAGAAATG

N1036A

GCAGAGAGTCTGCAGGGCGTCCAGGGAACACTGT and ACAGTGTCCCTGGACGCCCTGCAGACTCTCTGC

H1045A

ACTCTCTGCACAGTCTGTGCCAAGAGAGAACTGCCAG and CTGGCAGTTCTCTTTGGCACAGACTGTGCAGAGAGT

### Mutation of the ZRANB3 PCNA binding motifs

Q519A

CACTCACTTCGAAAAAGAAAAAGCTCATGATATTCGATCATTTTTTG and CAAAAATGATCGAATATCATGAGCTTTTTCTTTTTCGAAGTGAGTG

Q519A, F525A, F526A

GAAAAAGCTCATGATATTCGATCAGCTGCTGTACCACAACCTAAAAAAGACAG and

GAAAAAGCTCATGATATTCGATCAGCTGCTGTACCACAACCTAAAAAAGACAG

$\Delta$ APIM:

TACTTCCAATCCATGCCTAGGGTTCATAACATAA and TATCCACCTTTACTGTTATGTGATGTCTGATCCATGCTTTG

### PCNA into pET28a

Untagged

ATTGAGCTCATGATGTTTCGAGGCGGCC and ACTAACCTCGAGCTAAGATCCTTCTTCATCCTC

His-tagged

ACTAACCATATGTTTCGAGGCGGCC and ACTAACCTCGAGCTAAGATCCTTCTTCATCCTC

### FEN1 into YFP

GGGGACAAGTTTGTACAAAAAAGCAGGCTTCATGGGAATTCAGGCCTGGC and

GGGGACCACTTTGTACAAGAAAGCTGGGTATTATTTCCCTTTTAAACTTCCCTG

### Mutation of the FEN1 PIP box

Q337A

CCAAGGCAGCACCGGGCCGCTGGAT and ATCCAGGCGGCCGCGGTGCTGCCTTGG

F343A, F344A

AGGGCCGCTGGATGATGCCCAAGGTGACCGGCTCAC and GTGAGCCGGTACCTTGGCGGCATCATCCAGGCGGCCCT

### PCNA binding motifs into YFP

PIP

GGGGACAAGTTTGTACAAAAAAGCAGGCTTCATGCGAGCCCCTAAGAAAAAGCGGAAGGTGGGCGGCTTCACTCACTTCGAAAAAGAAAAACAG and GGGGACCACTTTGTACAAGAAAGCTGGGTATCATTITTTAGGTTGTGGTACAAAAATG

PIP\*

GGGGACAAGTTTGTACAAAAAAGCAGGCTTCATGCGAGCCCCTAAGAAAAAGCGGAAGGTGGGCGGCTTCACTCACTTCGAAAAAGAAAAAGCT and GGGGACCACTTTGTACAAGAAAGCTGGGTATCATTITTTAGGTTGTGGTACAGCAGCTG

APIM

GGGGACAAGTTTGTACAAAAAAGCAGGCTTCATGCGAGCCCCTAAGAAAAAGCGGAAGGTGGGCGGCCAGGTGAGAAGACAATCTCTAG and GGGGACCACTTTGTACAAGAAAGCTGGGTATTACTTCTTTACCAAAAATCGTGTGAT

APIM\*

GGGGACAAGTTTGTACAAAAAAGCAGGCTTCATGCGAGCCCCTAAGAAAAAGCGGAAGGTGGGCGGCCAGGTGAGAAGACAATCTCTAG and GGGGACCACTTTGTACAAGAAAGCTGGGTATTACTTCTTTACCAAGCTCGTGTGAT

### ZRANB3 into YFP

WT

GGGGACAAGTTTGTACAAAAAAGCAGGCTTCATGCCTAGGGTTCATAACATAAAAAAG and GGGGACCACTTTGTACAAGAAAGCTGGGTATTACTTCTTTACCAAAAATCGTGTGATG

ΔAPIM

GGGGACAAGTTTGTACAAAAAAGCAGGCTTCATGCCTAGGGTTCATAACATAAAAAAG and GGGGACCACTTTGTACAAGAAAGCTGGGTATTATGTGATGTCTGATCCATGCTTTG

### Cancer related ZRANB3 mutants

T66A

GAAATGGGTCTAGGAAAGGCAATCCAGGCAATTGGAA and TTCCAATTGCCTGGATTGCCTTTCCTAGACCCATTTTC

R169H

GAAATCCAGAAATGCAACTCACAGCAGGATTTTATTGCCAA and TTGGCAATAAAATCCTGCTGTGAGTTGCATTTCTGGATTTTC

G401D

TAAGCATTCAGGCTGCTGACCAGGGATTAACATTTAC and GTAAATGTTAATCCCTGGTCAGCAGCCTGAATGCTTA

R947Q

GTCAGGAAGAGTTTTGGATTCAATCTAATAACAGTTACCTGAG and CTCAGGTAAGTATTAGATTGAATCCAAAACCTTCTCTGAC

R947\*

TGTCAGGAAGAGTTTTGGATTGATCTAATAACAGTTACCTG and CAGGTAAGTATTAGATCAAATCCAAAACCTTCTCTGACA

D1020Y

GACATTTCTGGCAGGTGTATCACATCAAGCCAGTG and CACTGGCTTGATGTGATACACCTGCCAGAAATGTC
